# Supplementary material for: Visualized real-time flexible high-temperature sensing in Eu3+/Tb3+-doped Y2Mo3O12 negative thermal expansion material films
Source: Royal Society of Chemistry journal article supplement (doi:10.1039/d4tc01207k), 2024-01-01
Supplement: d4tc01207k1.pdf [file d4tc01207k1.pdf]

## Supporting information

### Visualized Real-Time Flexible High-Temperature Sensing in $\text{Eu}^{3+}/\text{Tb}^{3+}$ - doped $\text{Y}_2\text{Mo}_3\text{O}_{12}$ Negative Thermal Expansion Material Film

Shilei Yan<sup>a</sup>; Dongming Pi<sup>b</sup>; Yingzhu Zi<sup>a</sup>; Heping Zhao<sup>a</sup>; Rongbao Feng<sup>a</sup>; Keliang Ruan<sup>a</sup>; Jianbei Qiu<sup>a</sup>; Zhiguo Song<sup>a</sup>; Anjun Huang<sup>a</sup>; Yue Liu<sup>a</sup>; Yangke Cun<sup>a\*</sup>; Zhengwen Yang<sup>a\*</sup>;

<sup>a</sup>College of Materials Science and Engineering, Kunming University of Science and Technology, Kunming, 650093, China;

<sup>b</sup>Yunnan North Photoelectric Instrument Co. Ltd., Kunming 650114, China

\* Corresponding author.

E-mail: cunyangke@kust.edu.cn;

E-mail: yangzw@kust.edu.cn;

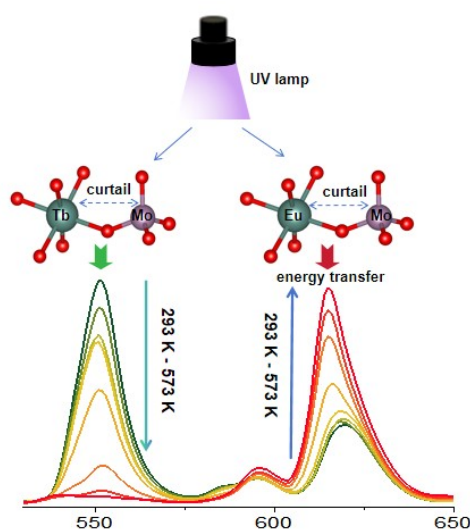

Fig S1. Visual temperature sensing mechanism diagram

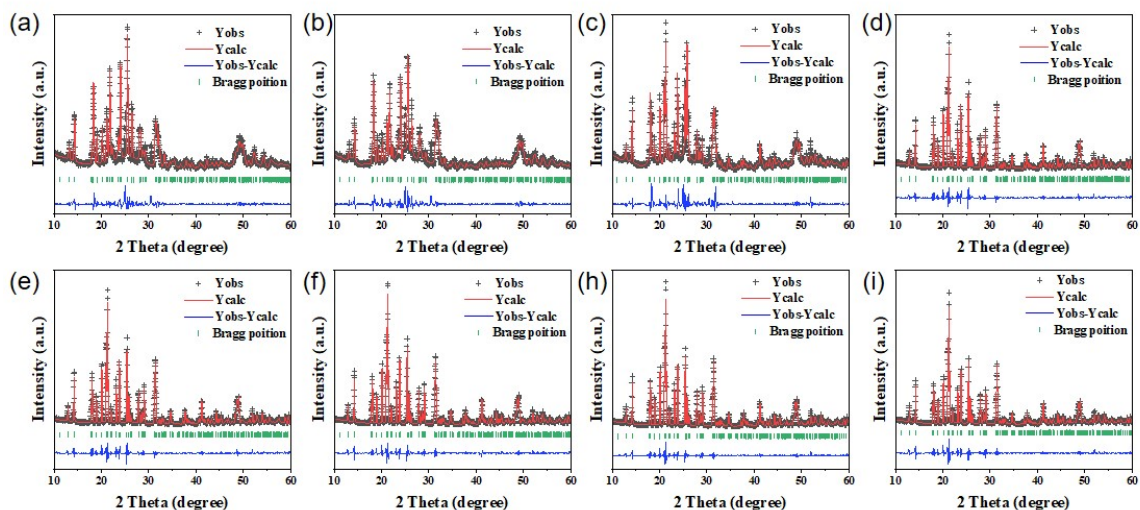

**Fig S2.** (a-i) The in-situ temperature-dependent refined XRD spectra of  $Y_2Mo_3O_{12}$  at

293 K, 333 K, 373 K, 413 K, 453 K, 493 K, 533 K, 573 K, respectively.

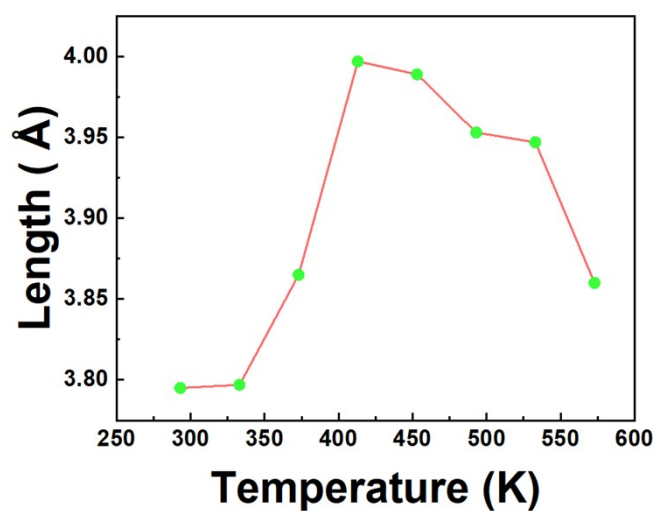

**Fig S3.** The ion distance between Y and Mo at 273 K-573 K

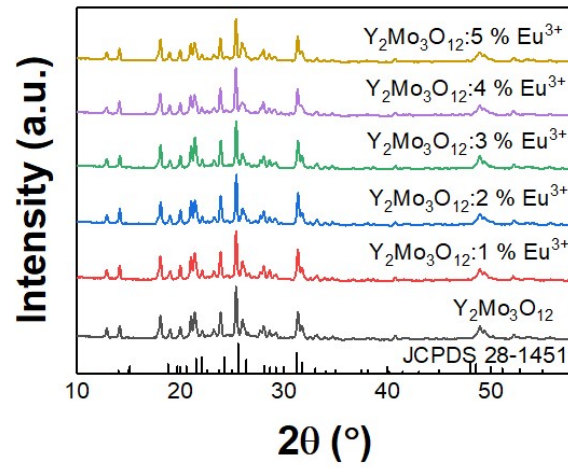

**Fig S4.** The XRD Spectra of  $Y_2Mo_3O_{12}:x\% Eu^{3+}$  ( $x = 0,1,2,3,4,5$ )

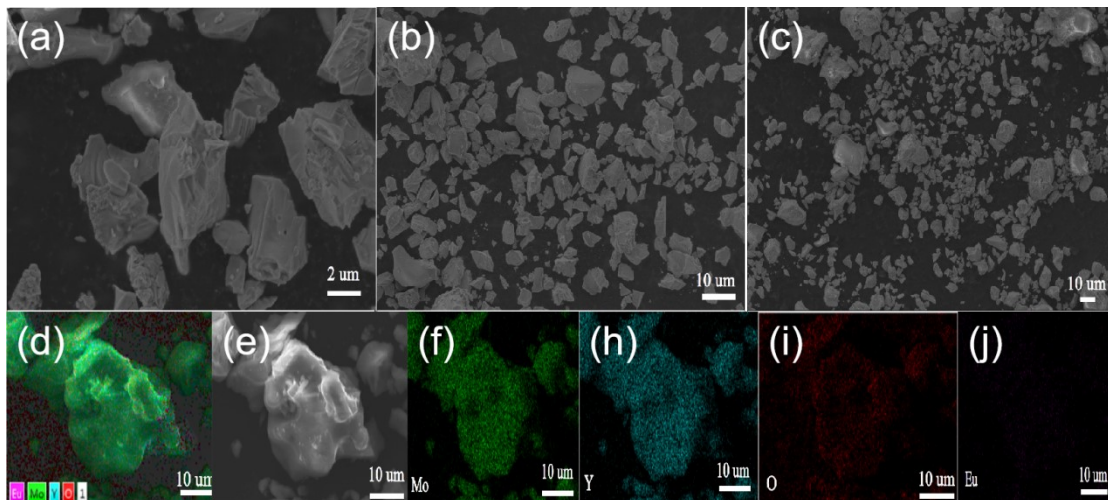

**Fig S5.** (a-c)The SEM with different magnification ratios of  $Y_2Mo_3O_{12}:4\% Eu^{3+}$

phosphor ; elemental mapping of Mo (f), Y(h), O (i) and Eu (j) elements

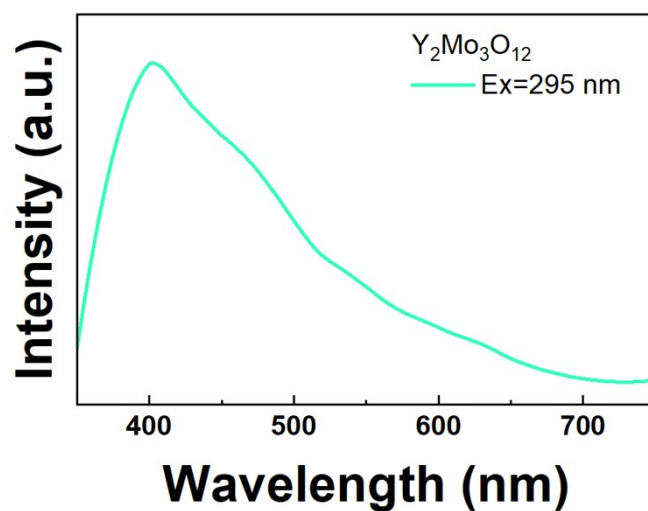

Fig S6. The PL spectrum of the  $Y_2Mo_3O_{12}$  substrate

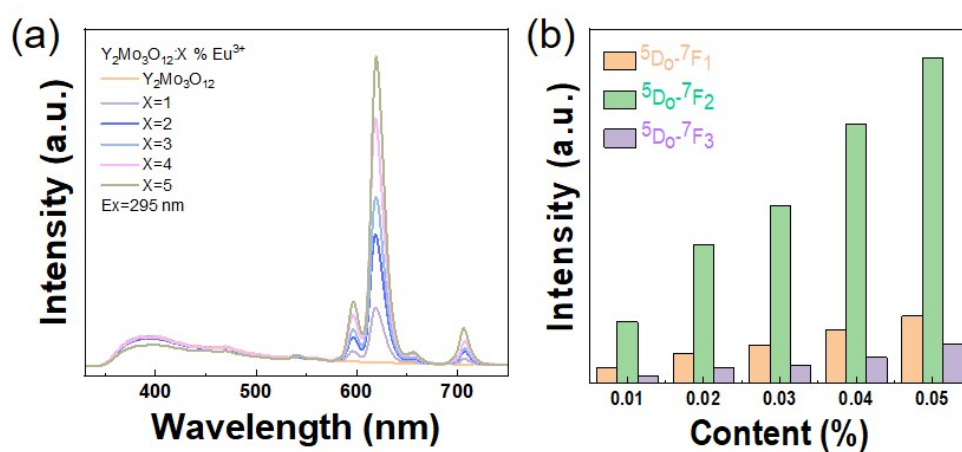

Fig S7. (a) The PL spectra and (b) integrated emission intensity of  $Y_2Mo_3O_{12}:x\% Eu^{3+}$  ( $x = 1, 2, 3, 4, 5$ ) under 295 nm excitation

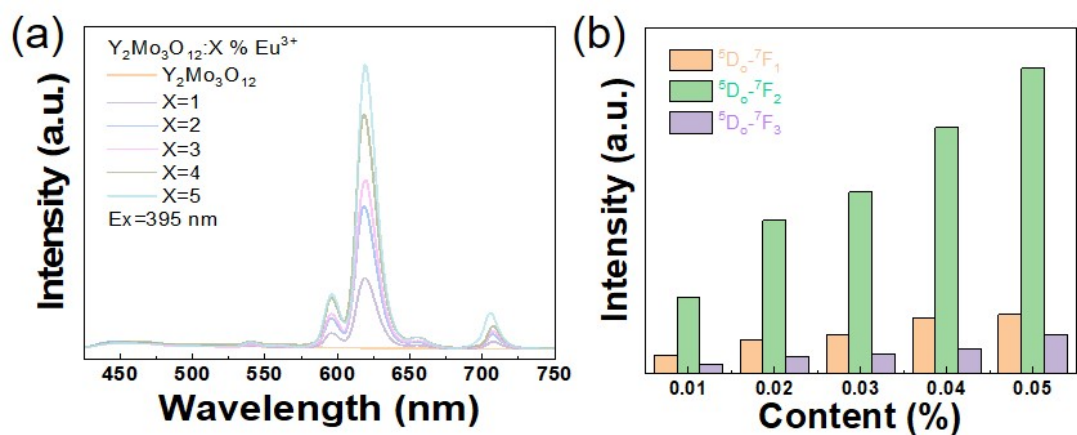

Fig S8. (a) The PL spectra and (b) integrated emission intensity of  $Y_2Mo_3O_{12}:x\% Eu^{3+}$  ( $x = 1, 2, 3, 4, 5$ ) under 395 nm excitation

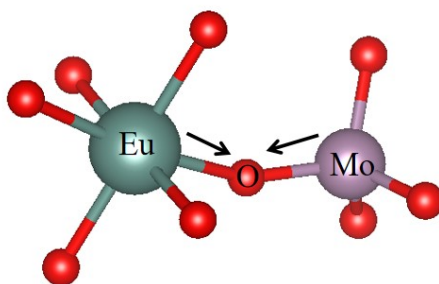

Fig S9. Thermal vibration diagram of Eu-O-Mo in  $Y_2Mo_3O_{12}:4\% Eu^{3+}$

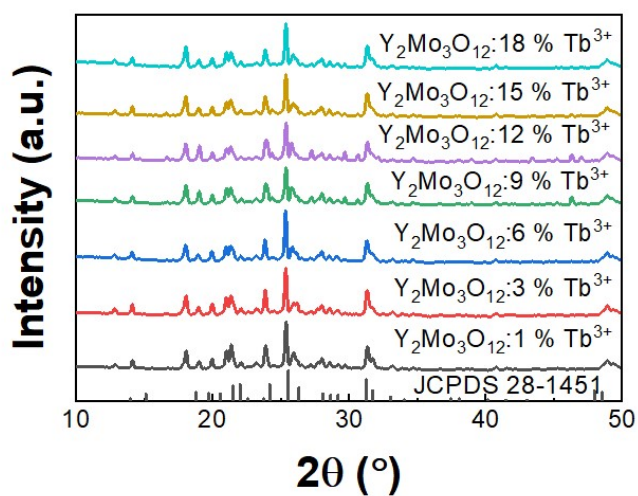

Fig S10. The XRD Spectra of  $Y_2Mo_3O_{12}:x\% Tb^{3+}$  ( $x = 0, 1, 3, 6, 9, 12, 15, 18$ )

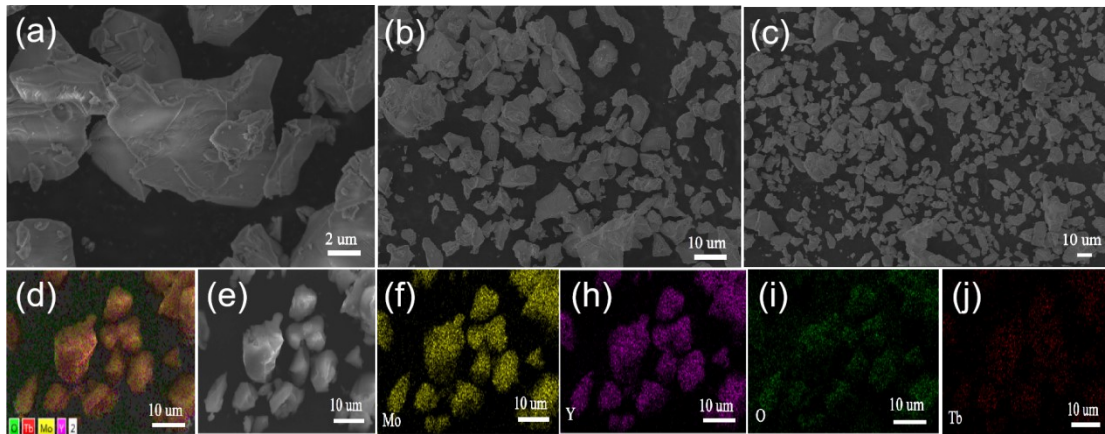

**Fig S11.** (a-c)The SEM with different magnification ratios of  $Y_2Mo_3O_{12}: 15\%Tb^{3+}$  phosphor ; elemental mapping of Mo (f), Y(h), O (i) and Tb (j) elements

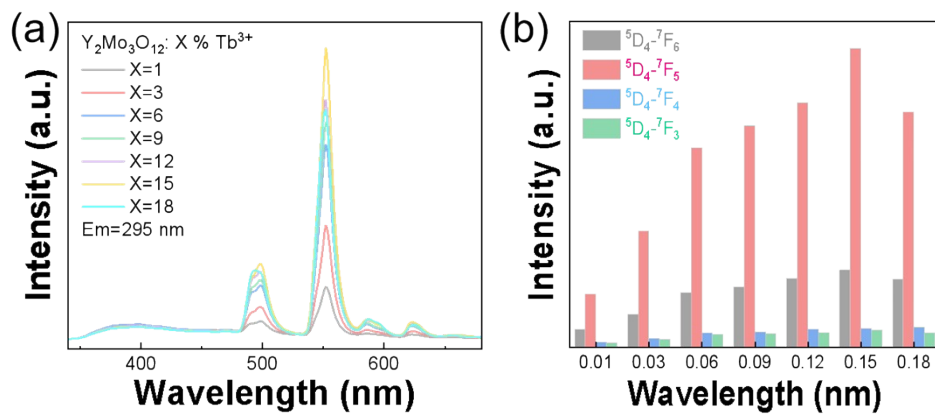

**Fig S12.** (a) The PL spectra and (b) integrated emission intensity of  $Y_2Mo_3O_{12}: X\% Tb^{3+}$  ( $X = 0,1,3,6,9,12,15,18$ ) under 295 nm excitation

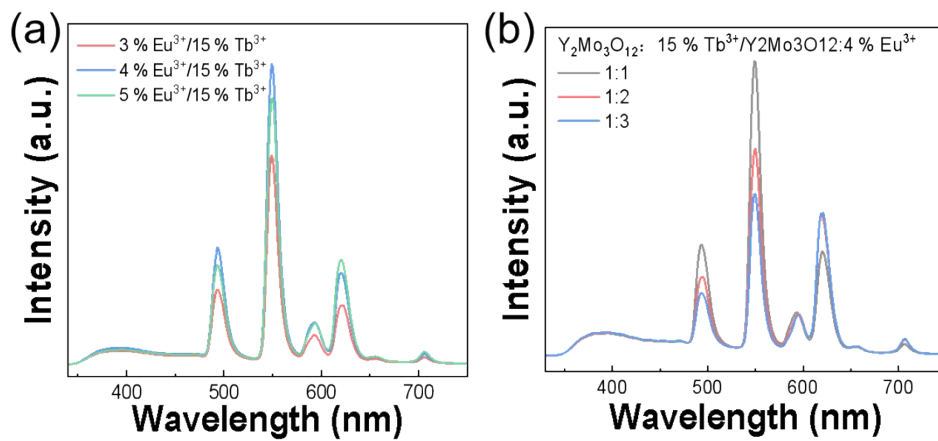

**Fig S13.** The PL spectrum of (a)  $\text{Y}_2\text{Mo}_3\text{O}_{12}$ :3%, 4%, 5%  $\text{Eu}^{3+}$  and  $\text{Y}_2\text{Mo}_3\text{O}_{12}$ :15%  $\text{Tb}^{3+}$  mixed phosphor and (b)  $\text{Y}_2\text{Mo}_3\text{O}_{12}$ :4% $\text{Eu}^{3+}$ /15%  $\text{Tb}^{3+}$  mixed mixed phosphor with different proportions of 1:1, 1:2, 1:3 under 295 nm excitation laser

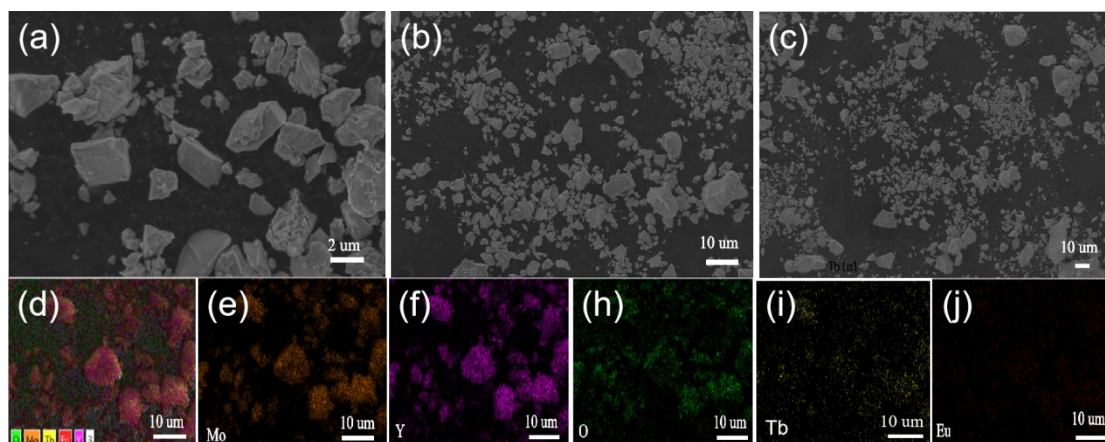

**Fig S14.** (a-c) The SEM with different magnification ratios of  $\text{Y}_2\text{Mo}_3\text{O}_{12}$ : 4 %  $\text{Eu}^{3+}$ /15%  $\text{Tb}^{3+}$  mixed phosphor; elemental mapping of Mo (e), Y (f), O (h), Tb (i) and Eu (j) elements

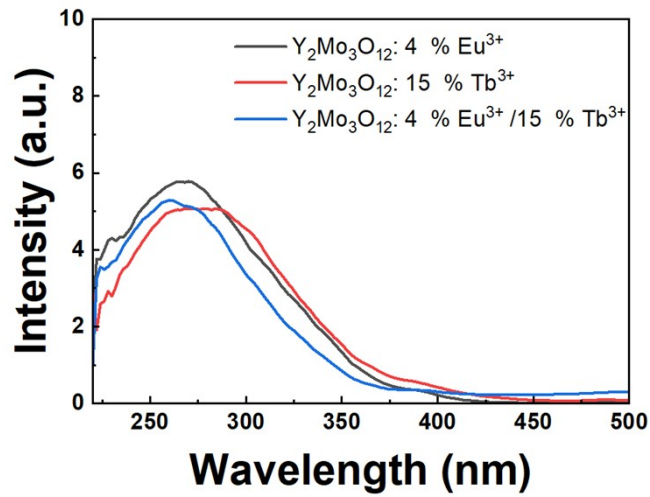

**Fig S15.**  $\text{Y}_2\text{Mo}_3\text{O}_{12}$ : 4%  $\text{Eu}^{3+}$ ,  $\text{Y}_2\text{Mo}_3\text{O}_{12}$ : 15%  $\text{Tb}^{3+}$  and  $\text{Y}_2\text{Mo}_3\text{O}_{12}$ : 4%  $\text{Eu}^{3+}$  / 15 %  $\text{Tb}^{3+}$  absorption spectra.

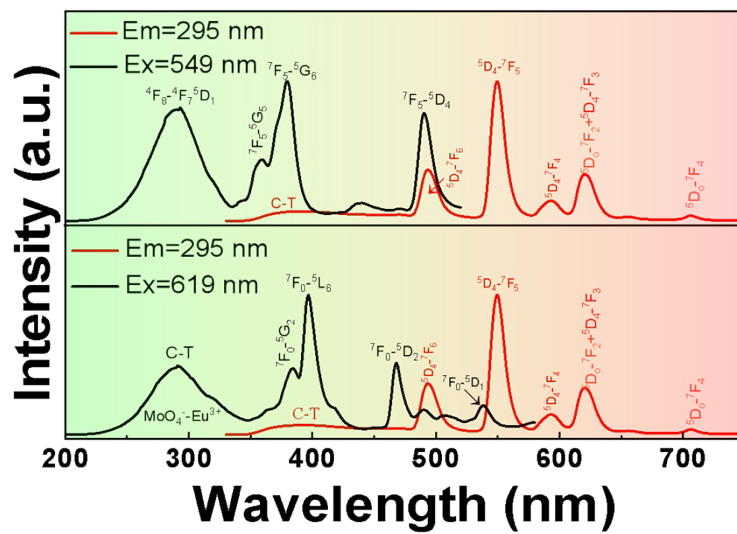

**Fig S16.** The excitation and emission spectra of  $\text{Y}_2\text{Mo}_3\text{O}_{12}$ : 4%  $\text{Eu}^{3+}$ /15%  $\text{Tb}^{3+}$  mixing phosphor.



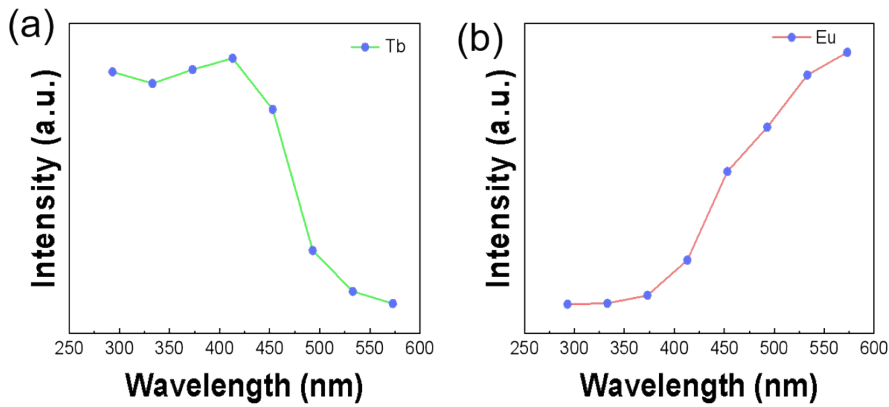

**Fig S17.** The integrated emission intensity of (a)  $Tb^{3+}$  (550 nm) and (b)  $Eu^{3+}$  (617 nm) in  $Y_2Mo_3O_{12}$ : 4%  $Eu^{3+}$ /15%  $Tb^{3+}$  mixed phosphor under 295 nm excitation at a temperature range of 293-573 K

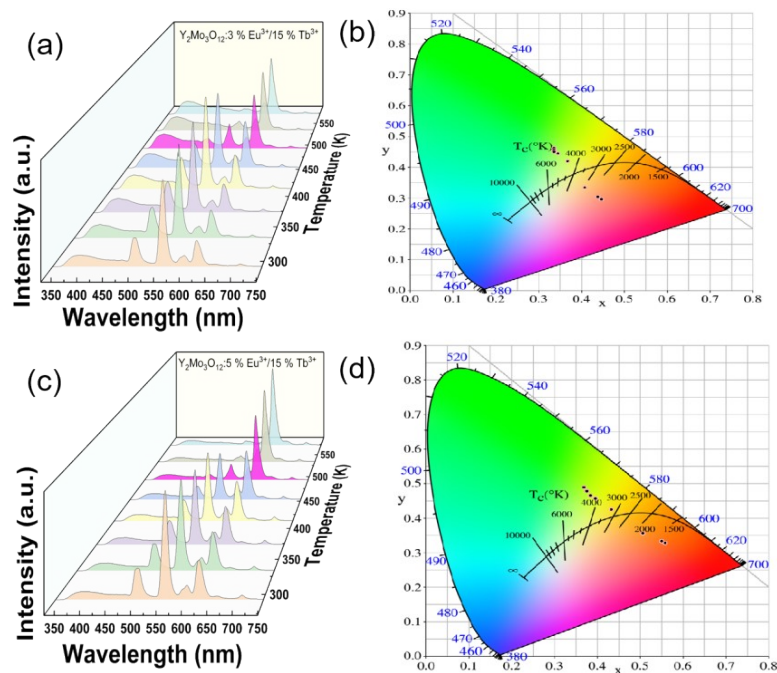

**Fig S18.** (a)  $Y_2Mo_3O_{12}$ : 3%  $Eu^{3+}$ /15%  $Tb^{3+}$  temperature-dependent PL spectra. (b)  $Y_2Mo_3O_{12}$ : 3%  $Eu^{3+}$ /15%  $Tb^{3+}$  temperature-dependent CIE coordinates. (c)  $Y_2Mo_3O_{12}$ : 5%  $Eu^{3+}$ /15%  $Tb^{3+}$  temperature-dependent PL spectra. (d)  $Y_2Mo_3O_{12}$ : 5%  $Eu^{3+}$ /15%  $Tb^{3+}$  temperature-dependent CIE coordinates.

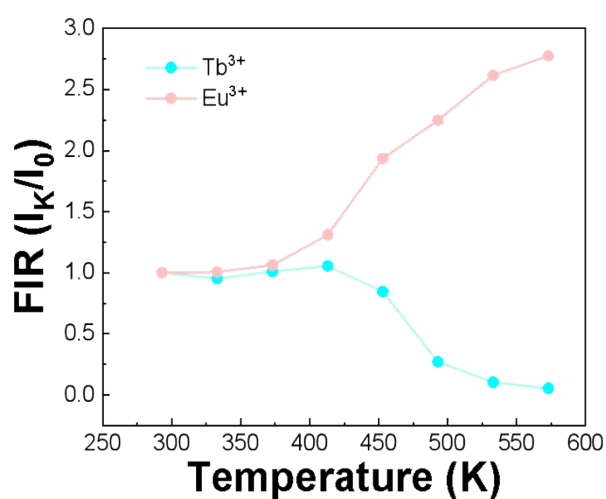

**Fig S19.** The  $I_T/I_0$  of  $Tb^{3+}$  (550 nm) and  $Eu^{3+}$  (617 nm) at a temperature range of 293-573 K.

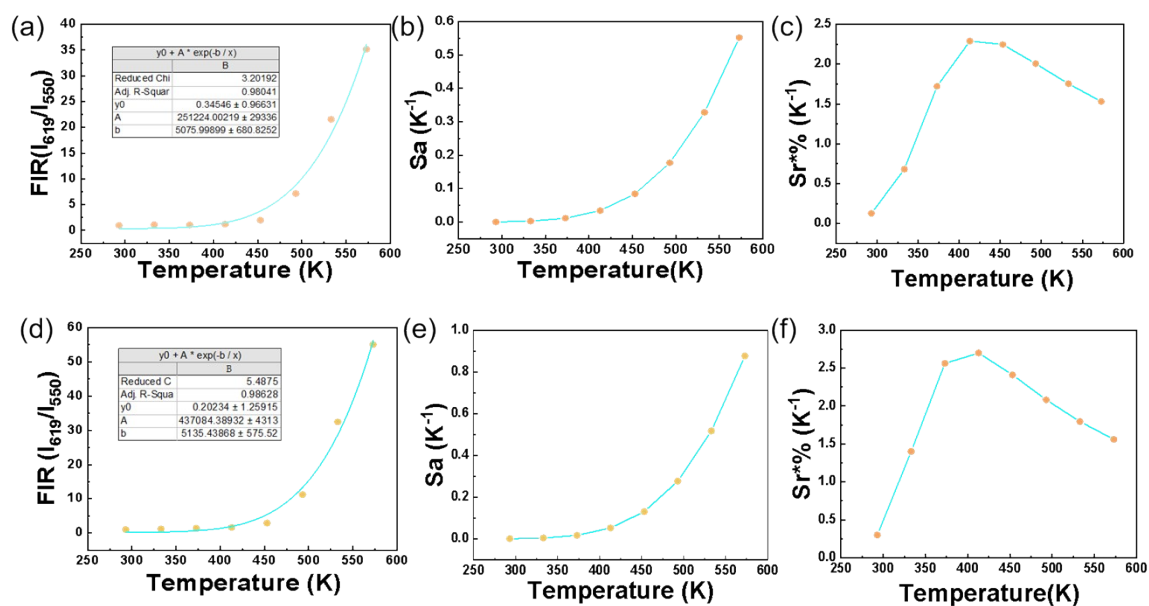

**Fig S20.** (a-c) The FIR, Sa, Sr of  $Y_2Mo_3O_{12}:3\%Eu^{3+}/15\%Tb^{3+}$  by monitoring Eu ( 619 nm) and Tb ( 550 nm ). ( d-f) The FIR, Sa, Sr of  $Y_2Mo_3O_{12}:5\%Eu^{3+}/15\%Tb^{3+}$  by monitoring Eu ( 619 nm) and Tb ( 550 nm ).

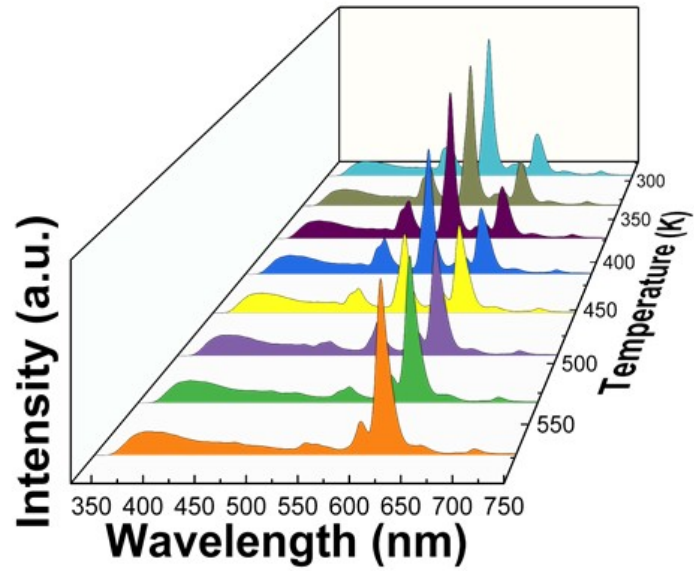

**Fig S21.** The PL spectra of  $\text{Y}_2\text{Mo}_3\text{O}_{12}$ : 4%  $\text{Eu}^{3+}$ /15%  $\text{Tb}^{3+}$  mixed phosphor during the cooling process.

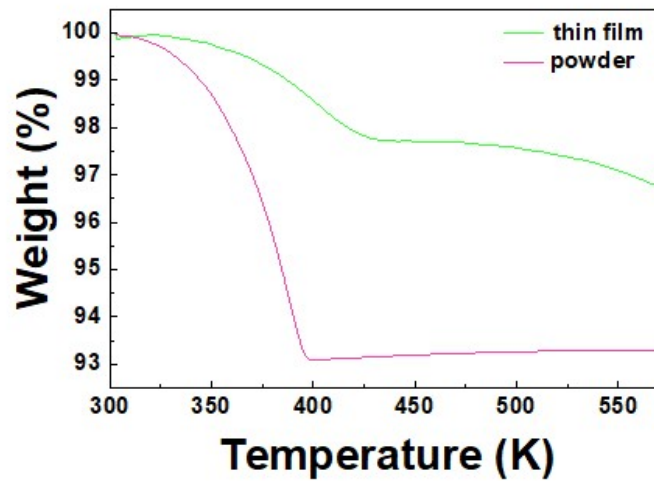

**Fig S22.** The TG curve of  $\text{Y}_2\text{Mo}_3\text{O}_{12}$ : $\text{Eu}^{3+}$ / $\text{Tb}^{3+}$  mixed material and flexible thin

**Table S1.** The lattice parameters and a/b/c-axis were refined and calculated based on the XRD patterns

| Temperature (K) | a(Å)   | b(Å)  | c(Å)   | V        |
|-----------------|--------|-------|--------|----------|
| 293             | 13.542 | 9.843 | 9.936  | 1324.611 |
| 333             | 13.503 | 9.842 | 9.975  | 1325.814 |
| 373             | 13.844 | 9.923 | 10.023 | 1377.069 |
| 413             | 13.864 | 9.928 | 10.016 | 1378.854 |
| 453             | 13.867 | 9.925 | 10.009 | 1377.774 |
| 493             | 13.864 | 9.923 | 10.009 | 1377.209 |
| 533             | 13.857 | 9.916 | 10.000 | 1374.304 |
| 573             | 13.847 | 9.918 | 9.999  | 1373.336 |

**Table S2.** Comparison of the performance of temperature sensor and visual temperature sensor

| Compounds                                                                                                                          | Temperature (K) | Sr (K <sup>-1</sup> ) | References |
|------------------------------------------------------------------------------------------------------------------------------------|-----------------|-----------------------|------------|
| YBO <sub>3</sub> : Bi <sup>3+</sup> /Eu <sup>3+</sup> /Tb <sup>3+</sup>                                                            | 293–473         | 0.57%                 | 43         |
| Y <sub>2</sub> O <sub>3</sub> : Eu <sup>3+</sup> / Tb <sup>3+</sup>                                                                | 313–513         | 0.68%                 | 44         |
| Sr <sub>3</sub> MoO <sub>6</sub> :Eu <sup>3+</sup> /Tb <sup>3+</sup>                                                               | 14–300          | 0.24%                 | 45         |
| Sc <sub>2</sub> W <sub>3</sub> O <sub>12</sub> :Eu <sup>3+</sup> /Tb <sup>3+</sup>                                                 | 298–473         | 2.94%                 | 46         |
| Gd <sub>2</sub> Mo <sub>3</sub> O <sub>12</sub> :Eu <sup>3+</sup> /Tb <sup>3+</sup>                                                | 80-450          | 0.50%                 | 47         |
| Y <sub>2</sub> Mo <sub>3</sub> O <sub>12</sub> :Eu <sup>3+</sup> /Y <sub>2</sub> Mo <sub>3</sub> O <sub>12</sub> :Tb <sup>3+</sup> | 293–573         | 2.56%                 | This work  |

**Table S3.** The CIE coordinates corresponding to the flexible film at 293 K to 573 K

| Temperature (K) | CIE x | CIE y |
|-----------------|-------|-------|
| 293             | 0.349 | 0.476 |
| 333             | 0.351 | 0.470 |
| 373             | 0.353 | 0.469 |
| 413             | 0.365 | 0.465 |
| 453             | 0.400 | 0.435 |
| 493             | 0.460 | 0.351 |
| 533             | 0.499 | 0.317 |
| 573             | 0.519 | 0.312 |
